# Supplementary material for: Analysis of the Anti-Inflammatory and Anti-Osteoarthritic Potential of Flonat Fast®, a Combination of Harpagophytum Procumbens DC. ex Meisn., Boswellia Serrata Roxb., Curcuma longa L., Bromelain and Escin (Aesculus hippocastanum), Evaluated in In Vitro Models of Inflammation Relevant to Osteoarthritis
Source: MDPI journal article supplement (doi:10.3390/ph15101263), 2022-10-13
Supplement: s1 [file s1]

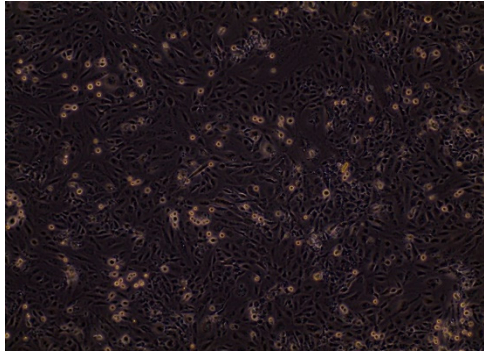

**(A)** Control,  
 $0.61 \pm 0.21$

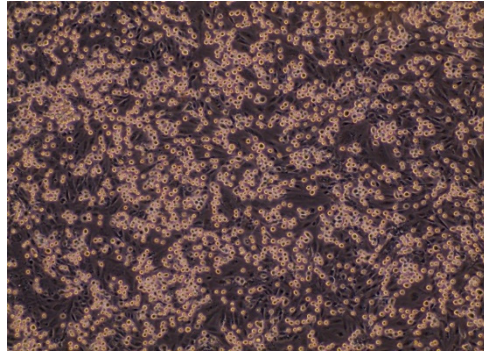

**(B)** TNF- $\alpha$  10 ng/mL  
 $11.93 \pm 0.47^\#$

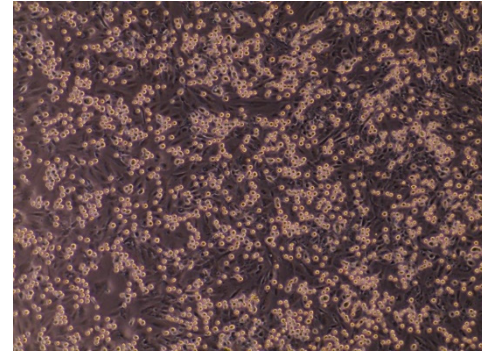

**(C)** B, 50  $\mu\text{g/mL}$  + TNF- $\alpha$ , 10  
ng/mL  
 $10.15 \pm 1.19$

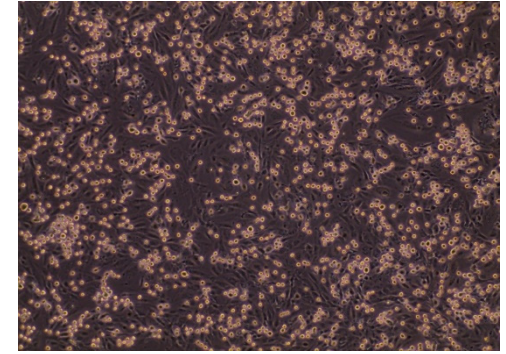

**(D)** HP, 250  $\mu\text{g/mL}$  + TNF- $\alpha$  10  
ng/mL  
 $8.42 \pm 0.74^*$

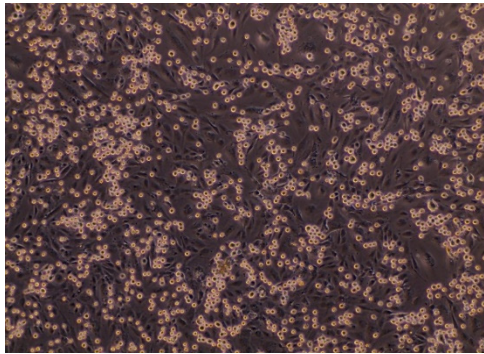

**(E)** E, 22.5  $\mu\text{g/mL}$  + TNF- $\alpha$  10  
ng/mL  
 $7.81 \pm 0.63^{**}$

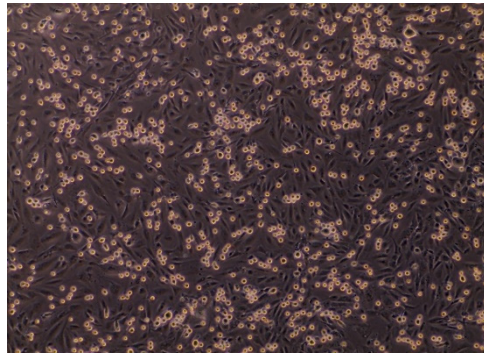

**(F)** BS, 5  $\mu\text{g/mL}$  + TNF- $\alpha$  10  
ng/mL  
 $5.75 \pm 0.84^{**}$

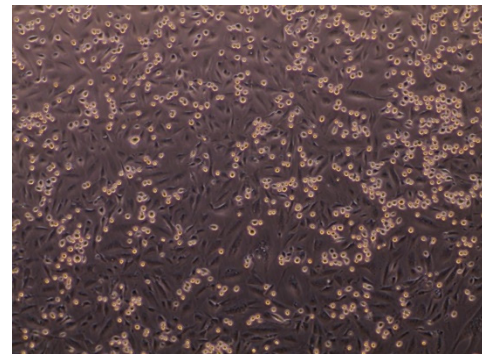

**(G)** C, 5  $\mu\text{g/mL}$  + TNF- $\alpha$  10  
ng/mL  
 $4.66 \pm 1.15^{**}$

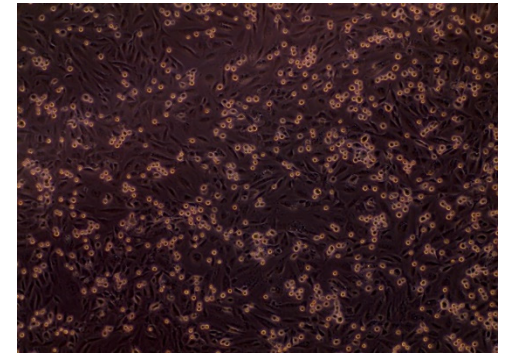

**(H)** FF + TNF- $\alpha$  10 ng/mL  
 $4.02 \pm 0.97^{**}$

**Figure S1.** HMEC-1 were treated with FF components (4 h) alone (from (C) to (G) or in combination at halved concentration (H) and then either treated with 10 ng/mL TNF- $\alpha$  (from (B) to (H) or left unstimulated (A) for further 18 h. THP-1 ( $10^6$  cells/mL) were then added to the HMEC-1 monolayers. After 1h, non-adhering cells were removed by three washes and images of HMEC-1 and adherent THP-1 cells were visualized and captured with a phase contrast microscope connected to a digital camera. Data (means  $\pm$  S.D., n = 3) are expressed as number of adherent monocytes per fields. #  $p < 0.01$  versus basal (untreated) control; \*  $p < 0.05$  versus TNF- $\alpha$  alone; \*\*  $p < 0.01$  versus TNF- $\alpha$  alone.
